# Supplementary material
Source: PubMed Central journal article supplement (PMC4071169)
Supplement: NIHMS581217-supplement-01.pdf [file NIHMS581217-supplement-01.pdf]

## **Extended Experimental Procedures**

### **293FT cell culture and lentiviral infection**

293FT cells cultured in growth medium (DMEM, 10% FBS, 500 µg/ml G418) were seeded in 96-well (primary screen) or 24-well plates (secondary and tertiary screens) at  $2.2 \times 10^4$  cells or  $1.32 \times 10^5$  cells per well, respectively, and incubated at 37°C in a 5% CO<sub>2</sub> humidified atmosphere for subsequent lentiviral infection. The RNAi Consortium (TRC) mouse kinase activity lentiviral shRNA library was purchased from ThermoScientific (RMM4957). 293FT cells were transfected with DNA from pLKO.1 plasmids expressing shRNAs targeting the mouse kinase gene family using Lipofectamine and plus according to the manufacturer's instructions. On the following day (day 2), medium was replaced with fresh 293FT medium containing 1.1% BSA, and cells were incubated at 37°C for an additional 2 days for lentivirus production. On day 4, 40 µl (96-well) or 200 µl (24-well) of lentivirus-containing medium was transferred to 4F-infected MEF plates (day 3).

### **Immunoblotting**

On day 4 of lentiviral infection, cells were rinsed with 1X PBS, trypsinized, and harvested by centrifugation at 1,000 rpm for 5 min at 4°C. Cell pellets were resuspended in ice-cold M-PER cell lysis buffer (Thermo Scientific) with 1X protease-phosphatase inhibitor cocktail (Thermo Scientific) and incubated for 15 min at 4°C with gentle agitation. Cell lysates were then centrifuged at 14,000 g for 15 min at 4°C, and supernatants were transferred to cold 1.7 ml tubes. After protein concentrations were determined using DC Protein assay (Bio-Rad), 80 µg of protein was resolved on a precast 4–20% gradient SDS-PAGE gel (Lenzo), semi-dry transferred onto a PVDF membrane, and immunoblotted with the following antibodies: anti-TESK1 (Abcam, ab92707), anti-GAPDH (Abcam, ab8245), anti-cofilin (Cell Signaling, #3318), anti-phospho-cofilin (Cell Signaling, #3313S), anti-rabbit IgG-HRP (Cell Signaling, #7074), and goat anti-mouse IgG-HRP (GE Health, NA9310). Following incubation with the secondary antibody, proteins were visualized using BM Chemiluminescence Western Blotting Substrate (POD) (Roche, 11500708001). The reproducibility of lentiviral shRNA knockdown was verified multiple times (five times with three replicates).

## **In vitro differentiation**

To induce spontaneous differentiation of iPSCs, iPSC clones that showed ESC-like proliferation and morphology were induced to form EBs using the hanging-drop method. CCE mESCs (Keller et al., 1993; Robertson et al., 1986) (StemCell Technologies) served as a control. On day 3, EBs were transferred to gelatin-coated 6-well plates and cultured with EB medium (DMEM, 15% FBS, MEM-NEAA, L-glutamine, MTG) for another 11 days. On day 14, cells were fixed with 4% paraformaldehyde (PFA) for immunostaining with the following antibodies: anti-AFP (R&D Systems, MAB1368), anti- $\beta$  III tubulin (Abcam, ab7751), and anti- $\alpha$ -actinin (Sigma, A7811). For spontaneous differentiation of human iPSCs, hiPSC clones were cultured in hESC medium (DMEM/F12, 20% KOSR, L-glutamine, MEM-NEAA,  $\beta$ -mercaptoethanol, 8 ng/ml bFGF) on irradiated CF-1 feeder layers and fed every day until ready for EB formation. To initiate EB-mediated differentiation, hiPSCs were washed with 1X PBS and incubated with 1 mg/ml dispase in DMEM/F12 for 5 min at 37°C. After scraping to small clumps, hiPSC colonies were washed twice with hEB medium (DMEM/F12, 10% FBS, L-glutamine) by sedimentation and plated on 6-well ultra-low attachment plates. hEB medium was changed every other day by sedimentation. On day 7, the colonies were plated in 0.1% gelatin-coated 6-well plates and cultured for an additional 7 days. On day 14, cells were fixed with 4% PFA for immunostaining.

## **Immunostaining**

Established iPSC clones were fixed in 4% PFA and permeabilized by 0.1% Triton X-100 in PBS. Cells were then blocked in 5% BSA in PBS containing 0.1% Triton X-100 for 1 h at room temperature. Primary antibodies anti-mNanog (Bethyl Lab, IHC00205) and anti-h/mSSEA1 (R&D Systems, MAB2156) were diluted between 1:100 and 1:400 in 2.5% BSA PBS containing 0.1% Triton X-100, according to the manufacturer's suggestion. Secondary antibody was diluted 1:400 and cells were stained for 45 min at room temperature. MEFs were plated on 0.1% gelatin-coated 12-well plates and transfected with 50 nM siRNA by Lipofectamine 2000 following the manufacturer's protocol. After 72 h, cells were fixed in 3.75% formaldehyde in PBS for 15 min on ice and permeabilized in 0.5% Triton X-100 in PBS. After blocking with 3% milk in PBS for 30 min, cells were stained for F-actin with rhodamine-conjugated phalloidin (Bitium Inc., #00027) at 1:40 dilution or with Hoechst 33342, trihydrochloride, trihydrate (Invitrogen, H3570) at 1:5,000 dilutions. To assess cytoskeletal rearrangement during reprogramming, MEFs were

plated in 12-well plates at  $4 \times 10^4$  cells/well. One day later, cells were transduced with 4F virus followed by lentivirus medium containing empty vector pLKO.1 or vectors expressing shRNAs targeting mouse TESK1 or LIMK2. Lentivirus was produced in 293FT cells as described above. Cells were fixed either immediately after addition of the lentivirus (day 0) or on days 2, 4, or 6, and immunostained with rhodamine-conjugated phalloidin, as described above. For immunoblot analysis, cell lysates were prepared on days 2, 4, or 6, and blotted using phospho-cofilin and total cofilin antibodies.

### **Light and electron microscopy**

MEFs were grown for 2–3 days on 4/2 carbon-coated finder grids (Quantifoil, GMBH). Epifluorescence images of fixed cells were acquired on an inverted light microscope (Eclipse TE 2000-U, Nikon) equipped with a manually controlled shutter, filter wheels, and a 14-bit cooled CCD camera (Orca II, Hamamatsu) controlled by MetaMorph software (Universal Imaging Corp.) by a Plan Fluor ELWD 40x/0.60 Ph2 or Plan Fluor 10x/0.30 Ph1 objective lens (Nikon). Viewing a large number of cells on a single grid, by using the grid finders, allows for localization of the exact individual cell in both light and in electron microscope imaging. Cells expressing control shRNA or shTESK1 were chemically fixed in CB containing 4% PFA, washed, and stained with aqueous 2% OsO<sub>4</sub> and 2% uranyl acetate. Dehydration in increasing concentrations of reagent-grade ethanol (15%, 20%, 50%, 70%, 95%, and 100%; 3 min per change) was followed by drying from liquid CO<sub>2</sub> by the critical-point method according to previously described methods (Anderson, 1951; Buckley and Porter, 1975). Images were obtained under low-dose conditions with a TecnaiG2 F20 microscope (FEI electron optics) equipped with FEG at 200keV. Kodak SO-163 plates were developed for 13 min by using D19 developer (Eastman Kodak Co., Rochester, NY).

### **Expression vectors for TESK1, COF-WT-GFP, and COF-S3A-GFP**

TESK1 cDNA was cloned with or without an N-terminal HA-tag into either the pMX retroviral vector or the pCDNA3.1 vector. The PCR-amplified 1.8 kb cDNA was inserted into BamHI and XhoI restriction enzyme sites. An internal SacI restriction site in the TESK1 cDNA sequence was used to clone the entire sequence in two parts. The following primers were used for cloning:

Part 1:

HA-tagged TESK1, fwd: 5'-

AATTGGATCCATGTACCTTATGATGTGCCGGATTATGCCATGGCCGGGGAACGGCCG  
CC-3'OR; BamH1-Tesk fwd: 5'-ATATATATGGATCCATGGCCGGGGAACGGCCGCC-3';  
and TESK1, set 1, rev: 5'-GCGATGAGCTCACAGAGGACGATCCCGAAG-3'

Part 2:

TESK1, set 2, fwd: 5'-CCAGAGGTGTTGCGGGGAGAGCTGTATGAT-3'

Xho1-TESK1 Rev: 5'-AATTCTCGAGCTAAGAGCGTGCCCCAGGCAGCTG CA-3'

GFP tagged wild-type (COF-WT-GFP) and the phosphorylation site mutant COF (COF-S3A-GFP) were PCR amplified from pCDNA Cof-WT-GFP or pCDNA Cof-S3A-GFP (Delorme et al., 2007), respectively, using the primers, hsa-Hind III-Cof-WT-Fw (GATCAAGCTTATGGCCTCCGGTGTGGCTGTCTCT) or hsa-Hind III-Cof MutS3A-Fw (GATCAAGCTTATGGCCGCCGGTGTGGCTGTCTCTG) and hsa-XhoI-Cof-Rv (GATCCTCGAGCAAAGGCTTGCCCTCCAGGGAGATG). The amplified fragments were digested and cloned into pMX vector.

For overexpression of TESK1, HA-TESK1, and COF proteins, MEFs were transduced with the pMX retroviral vector as described above.

### **Human iPSC generation and characterization**

Fibroblast culture medium: DMEM, 10% FBS, 1 mM of NEAA. iPSC culture medium: DMEM/F12, 20% Knockout™ Serum Replacement, 1 mM NEAA, 5 mM β-mercaptoethanol, *1x anti-anti*, 10 ng/mL bFGF. Ectoderm differentiation media: DMEM/F12, 20% Knockout™ Serum Replacement, 1 mM NEAA, 5 mM β-mercaptoethanol, and 2 μM each of dorsomorphin (iGentBio), A83-01 (Tocris), and PNU 74654 (Tocris). Mesoderm differentiation medium: DMEM/F12, 20% FBS, NEAA. Endoderm differentiation medium: DMEM/F12, 0.5% FBS, 50 ng/ml Activin A, and 100 ng/ml Wnt3A (Stem RD). For reprogramming, human foreskin fibroblast (BJ) cells ( $\sim 0.7 \times 10^6$  cells) were transfected with non-targeting or TESK1 siRNA (50 pmol) together with the episomal DNA cocktail (Addgene) as described (Okita et al., 2011; Yu et al., 2009). Transfected cells were cultured in fibroblast growth medium for 7 days, trypsinized, and re-seeded on CF1 MEF feeders ( $5 \times 10^4$  cells/cm<sup>2</sup>). iPSC cells were maintained in culture media for 5 weeks, then the iPSC colonies were picked and maintained on CF1 MEF feeders for

further characterization. The iPSCs were maintained in NutriStem XF/FF culture medium (Stemgent) prior to in vitro differentiation. For ectoderm differentiation, the cells were seeded on Matrigel (BD Biosciences)-coated plates in NutriStem medium for 2–3 days until 50–60% confluent, and then treated with ectoderm differentiation medium for 5–7 days until cell clusters with a neural rosette structure were observed under microscope. For mesoderm differentiation, EBs were formed and maintained in mesoderm differentiation medium in suspension culture in ultra-low attachment plates (Corning Costa) for 6 days, and then transferred to wells coated with 0.1% gelatin (Stem Cell Technologies) in the same medium for an additional 6–8 days until the beating colonies were observed. For endoderm differentiation, the cells were treated with Accutase to yield single cells and seeded on Matrigel-coated plates at  $10^4$  cells/cm<sup>2</sup> in NutriStem medium for 2–3 days until 50–60% confluent. The cells were then treated with endoderm differentiation medium for 3–5 days before immunostaining.

For teratoma formation, iPSCs were injected into the SCID mice and the tumors were harvested eight weeks later. The tumors were embedded in paraffin, sectioned, and stained with H&E. For alkaline phosphatase staining, iPSCs were fixed with 4% PFA (Affymetrix) and stained with an AP staining kit (Vector labs) according to the manufacturer's protocol. For immunostaining, iPSCs were fixed in 4% PFA and stained with antibodies against Oct4, Sox2, Nanog, Tra-1-60, Tra-1-81 (Cell Signaling), and SSEA3 (Millipore). Ectoderm lineage cells were stained with Pax6 (Covance) and Nestin (Abcam), mesoderm lineage cells were stained with  $\alpha$ -SMA (Sigma) and  $\alpha$ -actinin (Sigma), endoderm cells were stained with Sox17 and FoxA2 (both R&D Systems).

## References

- Anderson, T.F. (1951). Techniques for the preservation of three-dimensional structure in preparing specimens. *EM Trans NY Acad Sci* *13*, 130-134.
- Buckley, I.K., and Porter, K.R. (1975). Electron microscopy of critical point dried whole cultured cells. *J Microsc* *104*, 107-120.
- Delorme, V., Machacek, M., DerMardirossian, C., Anderson, K.L., Wittmann, T., Hanein, D., Waterman-Storer, C., Danuser, G., and Bokoch, G.M. (2007). Cofilin activity downstream of Pak1 regulates cell protrusion efficiency by organizing lamellipodium and lamella actin networks. *Developmental cell* *13*, 646-662.
- Keller, G., Kennedy, M., Papayannopoulou, T., and Wiles, M.V. (1993). Hematopoietic commitment during embryonic stem cell differentiation in culture. *Mol Cell Biol* *13*, 473-486.

Okita, K., Matsumura, Y., Sato, Y., Okada, A., Morizane, A., Okamoto, S., Hong, H., Nakagawa, M., Tanabe, K., Tezuka, K., *et al.* (2011). A more efficient method to generate integration-free human iPS cells. *Nature methods* 8, 409-412.

Robertson, E., Bradley, A., Kuehn, M., and Evans, M. (1986). Germ-line transmission of genes introduced into cultured pluripotential cells by retroviral vector. *Nature* 323, 445-448.

Yu, J., Hu, K., Smuga-Otto, K., Tian, S., Stewart, R., Slukvin, II, and Thomson, J.A. (2009). Human induced pluripotent stem cells free of vector and transgene sequences. *Science* 324, 797-801.

**Fig S1**

**A**

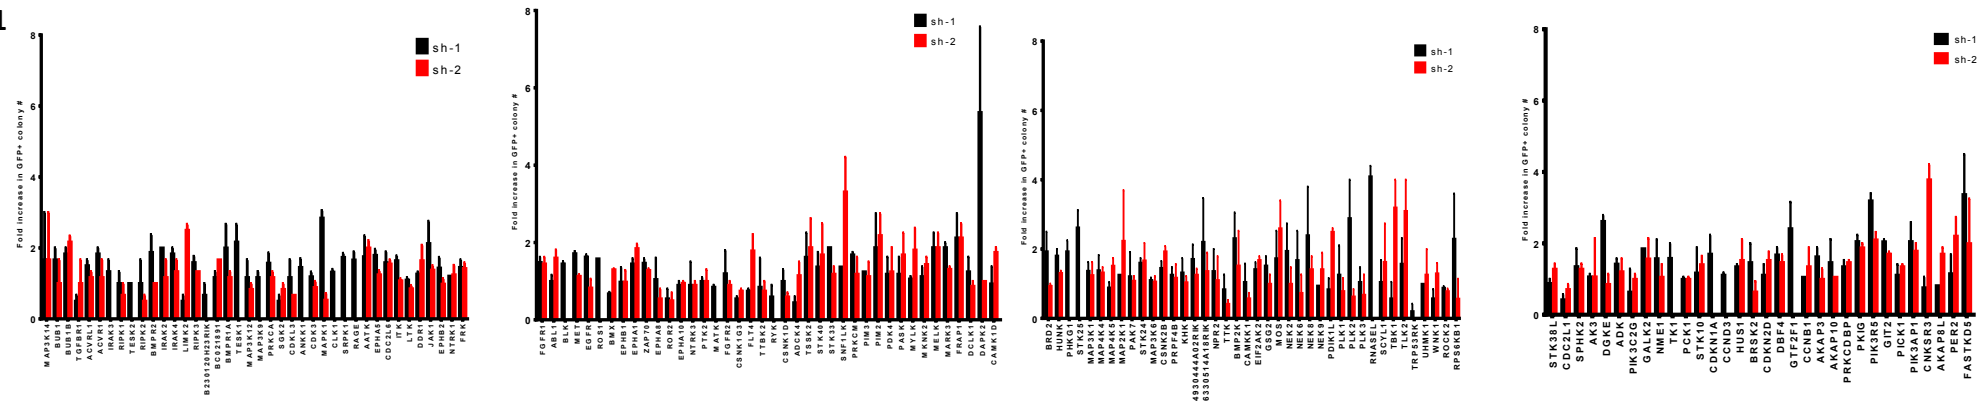

**B**

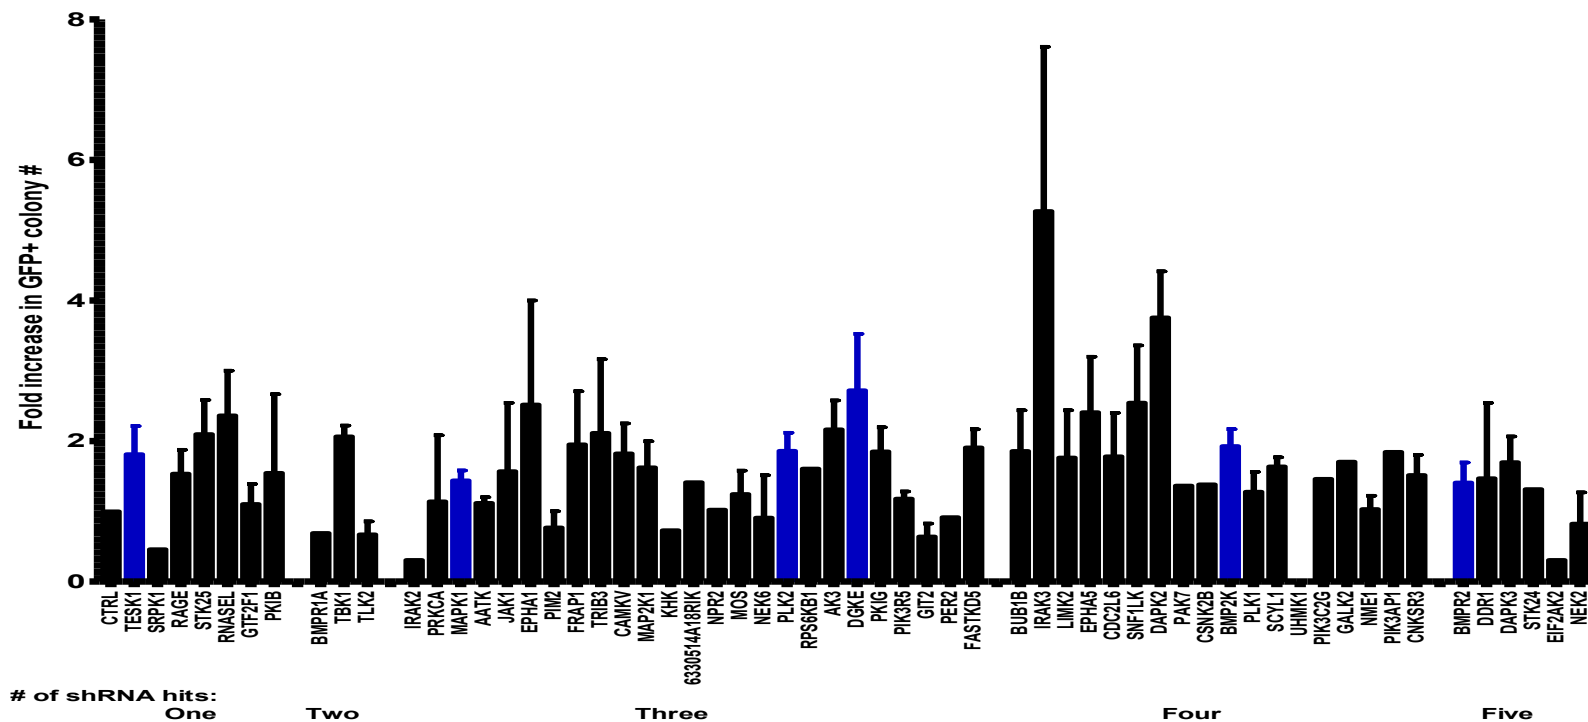

**C**

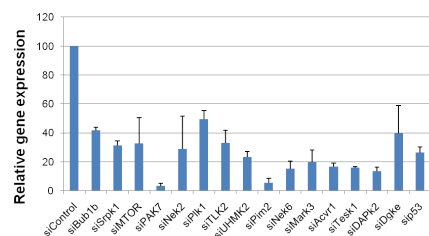

**D**

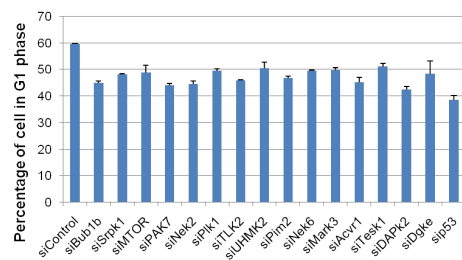

**E**

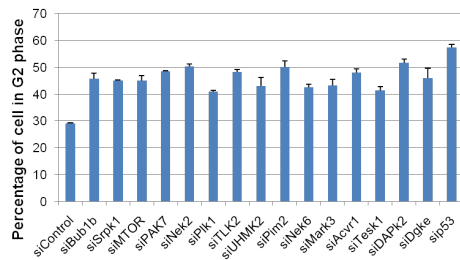

**F**

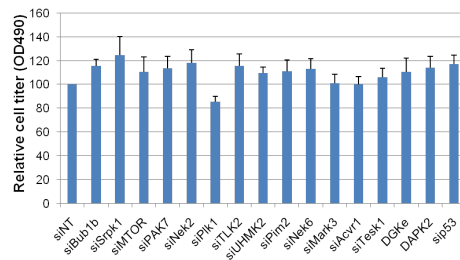

## **Figure S1, related to Figure 1. Identification of kinases acting as barriers for iPSC generation**

Kinase genes identified as hits in the primary screen were confirmed by secondary and tertiary screens. After the primary screen (Figure 1B), kinase genes were grouped by the number of shRNAs targeting a single gene that led to a 2-fold increase in GFP<sup>+</sup> colony numbers. Kinases targeted by at least two shRNAs (sh-1 and sh-2) were chosen as candidates for further analysis. In addition, kinases targeted with a single shRNA were included if they induced a >6-fold increase in GFP<sup>+</sup> colony numbers. The grouping of targets based on the primary screen is labeled. From the primary screen, 153 genes were tested in the secondary screen (A) and 59 genes were tested in the tertiary (B) screen. Among the 59 selected genes, knockdown of 39 genes increased GFP<sup>+</sup> colony numbers by  $\geq 1.5$ -fold and knockdown of 20 genes increased GFP<sup>+</sup> colony numbers at least 2.0-fold in both the secondary and tertiary screens. Blue bars in (B) indicate the six kinases selected for detailed investigation. (C) Candidate kinases were efficiently knocked down by siRNAs. Fifteen kinases that function in cell cycle and cytoskeleton formation were chosen from the tertiary screen. siRNA-mediated knockdown efficiency was confirmed by RT-qPCR on day 2 post-transfection. Results are mean  $\pm$  SD from two independent experiments with duplicate wells. (D-E) Knockdown of selected kinases reduced the proportion of cells in (D) G1 phase and (E) G2 phase of the cell cycle. siRNA-transfected MEFs were stained with PI and analyzed by FACS. The percentage of cells in G1 and G2 was quantified by ModFit. p53-targeted siRNA was used as the control. (F) Knockdown of selected kinases did not affect cell proliferation. MEFs were transfected with siRNAs targeting the indicated kinases and proliferation was measured by addition of CellTiter AQueous One solution. Optical densities (OD) were read at 490 nm.



**A**

**I. Amino Acid Metabolism, Post Translational Modification, Small Molecule Biochemistry**

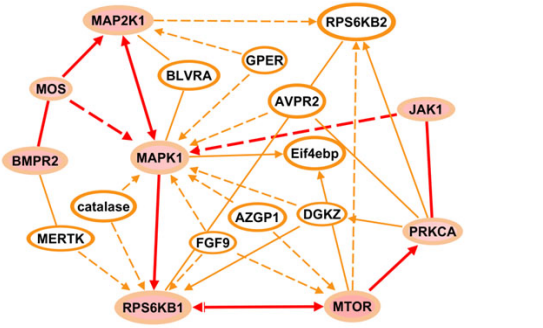

**II. Gene Expression, Cellular Development**

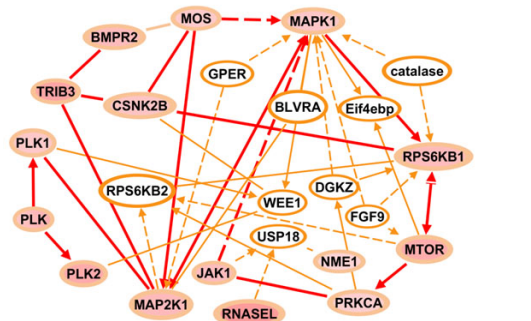

**III. Cell Cycle, Cell Signaling and Cell Death**

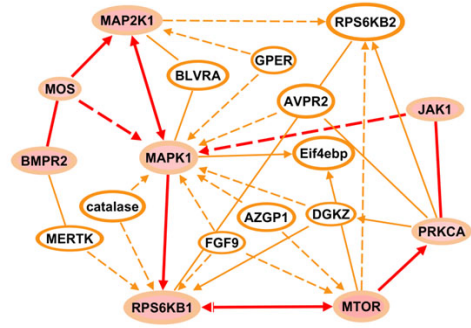

**IV. Cellular Growth and Proliferation, Cancer**

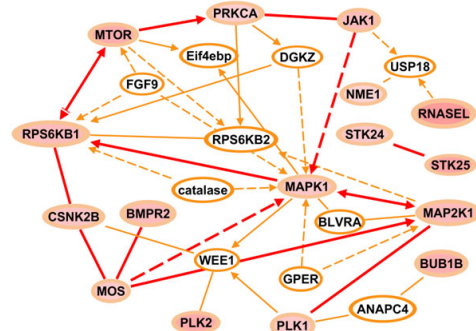

**B**

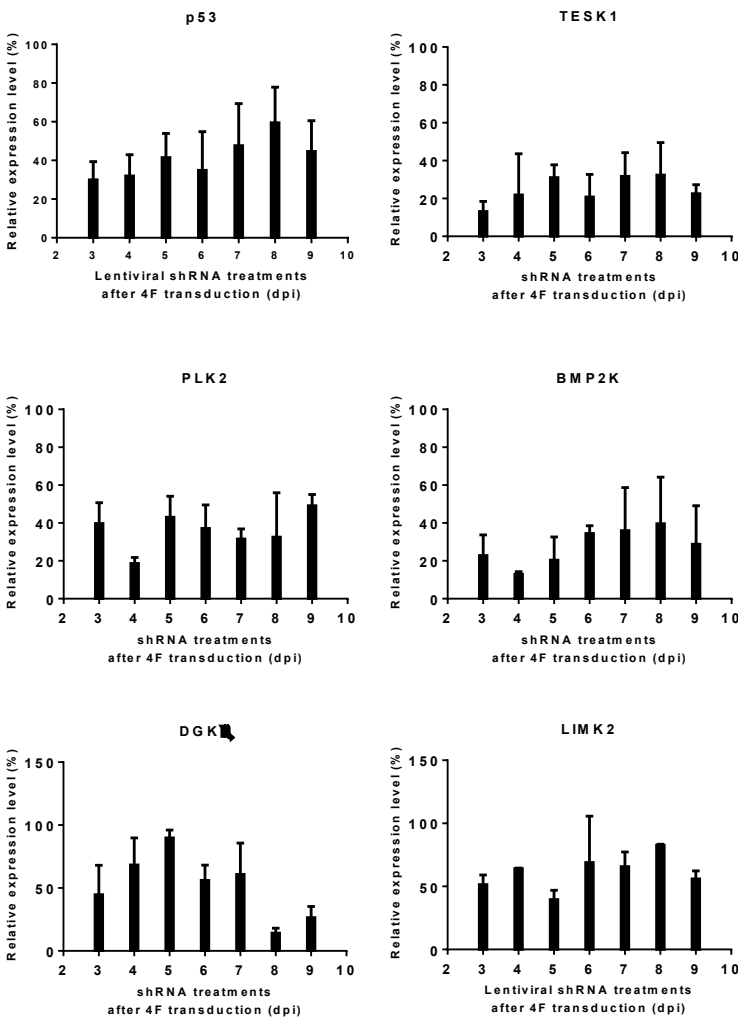

**C**

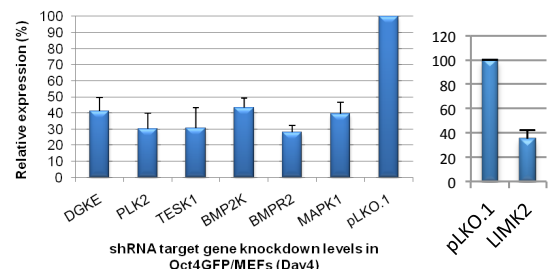

**Figure S2, related to Figure 2. Bioinformatics analysis and characterization of kinase KD**

(A) The 59 kinase genes confirmed by the tertiary screen and identified as barriers for reprogramming were evaluated for interactions with various biological functional networks using the Ingenuity Pathways Knowledge Base (IPKB) analysis. The top ten highly interconnected molecular functions identified from the analysis are shown as four networks. Interactions are characterized by the following arrows: direct interactions (solid lines); indirect interactions (dotted lines); activation by kinases (arrowheads); and inhibitory action (vertical lines next to arrowheads [e.g., MTOR to RPS6KB1]). Red lines show interactions between kinases identified in our functional genomics screen and the kinases are shown in pink. (B) Efficient shRNA-mediated knockdown of six kinases at different times after 4F transduction. Knockdown was determined by RT-qPCR of total RNA extracted 4 days following shRNA lentiviral transduction. Expression levels in samples treated with pLKO.1-empty vector were set as 100%. Results are mean  $\pm$  SD of two independent experiments performed in triplicate. (C) Seven identified kinases were efficiently knocked down by shRNAs. Total RNA was extracted 4 days after lentiviral transduction. Expression levels in the pLKO.1 sample were set as 100%. Results are mean  $\pm$  SD of three independent experiments. RNA purified from these experiments was used for examining the E-cad expression levels shown in Figure 2B for these kinases.

**Fig S3**

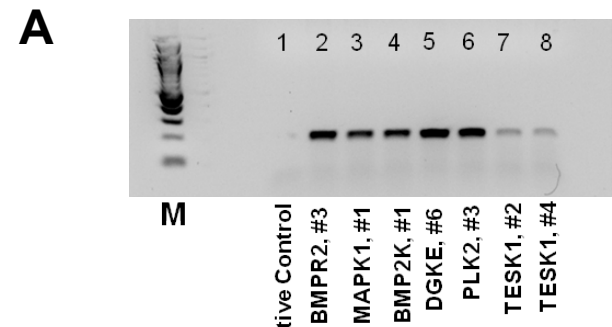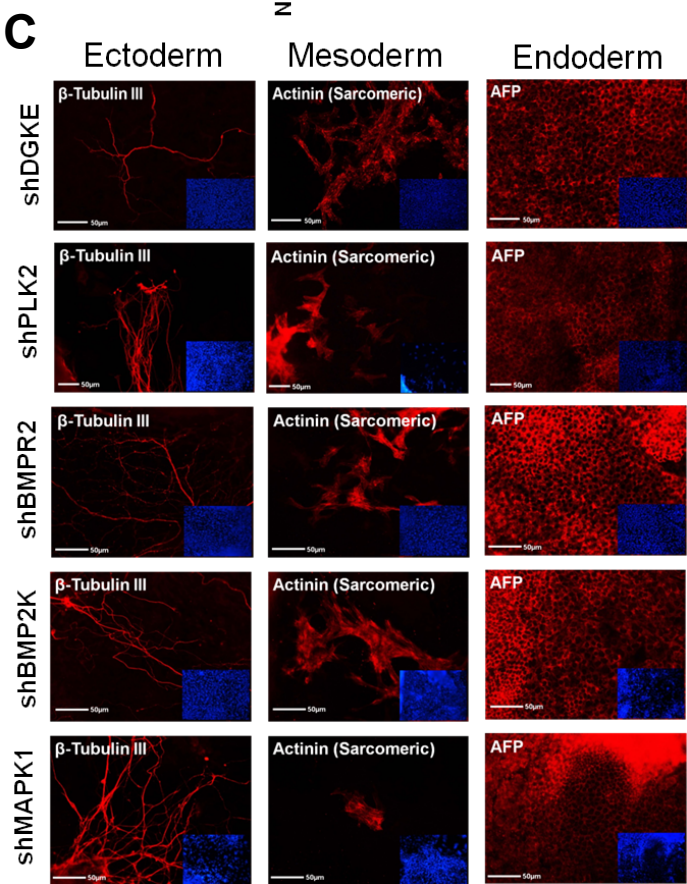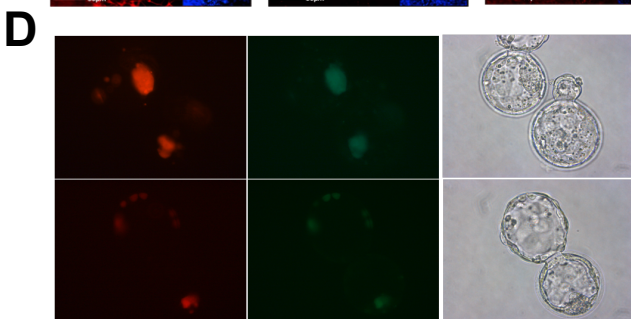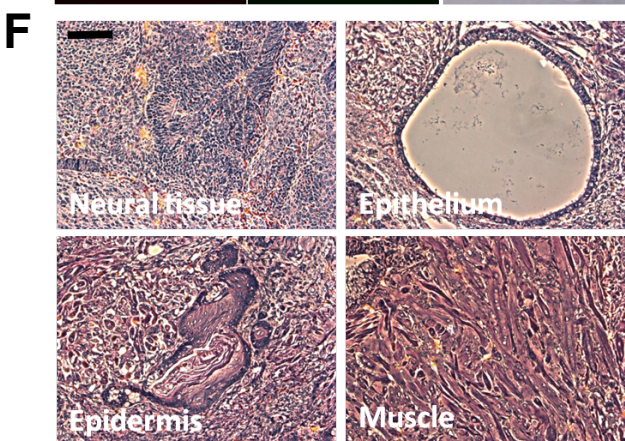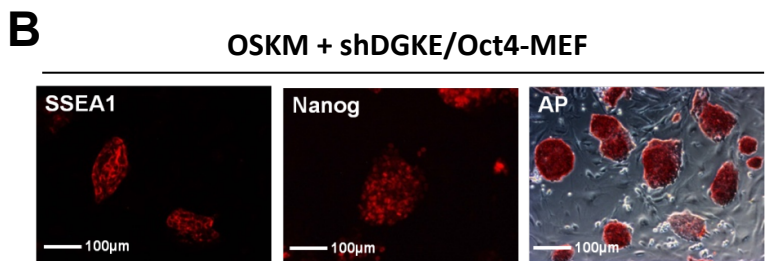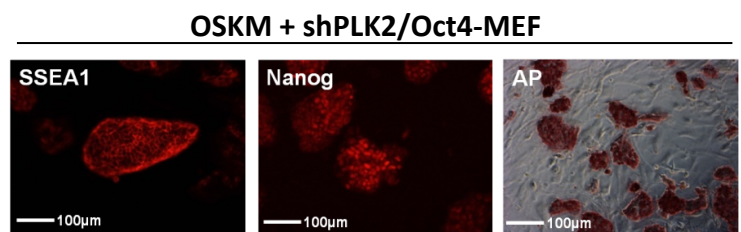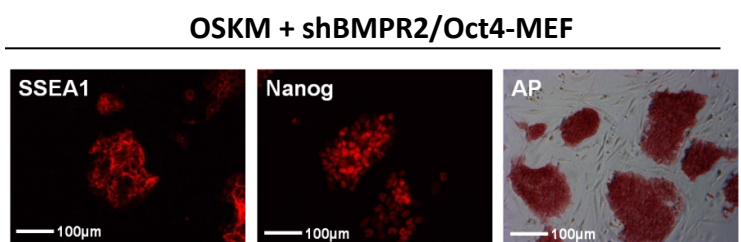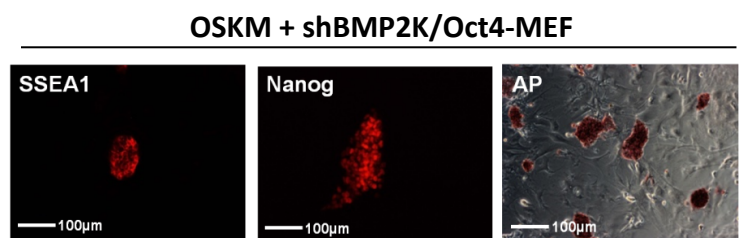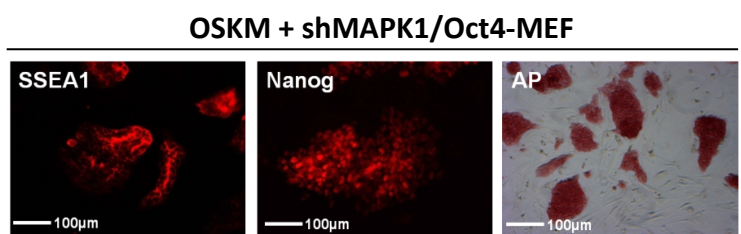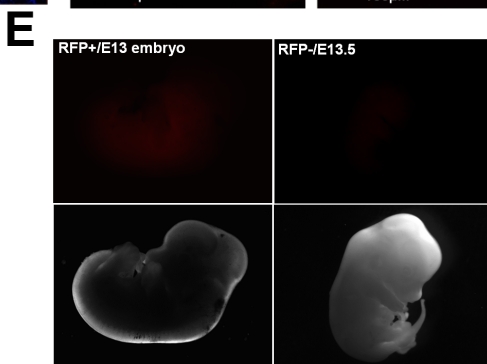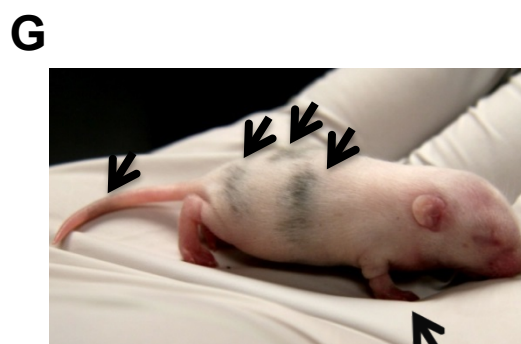

### **Figure S3, related to Figure 3. Characterization of kinase-knockdown iPSCs**

(A) Genomic integration of shRNAs. Integration of shRNAs in genomic DNA was assessed by PCR amplification of the puromycin marker gene in the pLKO.1 vector. Genomic DNA was isolated from one clone each of five kinase-KD iPSCs (BMPR2 clone #2, MAPK1 clone #1, BMP2K clone #1, DGK $\epsilon$  clone #6, PLK2 clone #3) and from two clones of TESK1-KD cells (clone #2 and #4, which were further characterized for teratoma formation). For the negative control, water replaced the primer set. (B) iPSCs derived from MEFs expressing kinase shRNAs express ESC pluripotent markers. GFP<sup>+</sup> kinase-KD MEFs were cultured on feeder layers and immunostained for SSEA-1, Nanog, and AP on day 16. (C) iPSCs derived from MEFs expressing kinase shRNAs differentiate into three germ layers *in vitro*. EBs were formed using the hanging-drop method and allowed to undergo spontaneous differentiation. On day 14, differentiated cells were fixed with 4% PFA and immunostained for  $\beta$ -tubulin III (ectoderm), sarcomeric actinin (mesoderm), or  $\alpha$ -fetoprotein (AFP; endoderm). DAPI as nuclear marker shows the cells in the imaged area. (D) Injected shTESK1-iPSCs integrated into the recipient embryos. Upper panel: injected iPSCs at day 0. Lower panel: injected iPSCs at day 1. shTESK1-iPSCs were labeled with constitutive RFP expression vectors before injection. (E) shTESK1-iPSCs contributed to E13.5 embryos. RFP signal indicates the contribution of injected iPSCs in recipient embryos. (F) H&E staining of teratoma derived from iPSCs. Nude mice were injected with  $1.5 \times 10^6$  iPSCs and tumors were harvested ~3–4 weeks later. (G) Approximately 12–18 TESK1-knockdown iPSCs were injected into the blastocysts of albino C57BL/6 mice. The contribution from the iPSCs can be seen as the black coat color (arrow).

**Fig S4****A**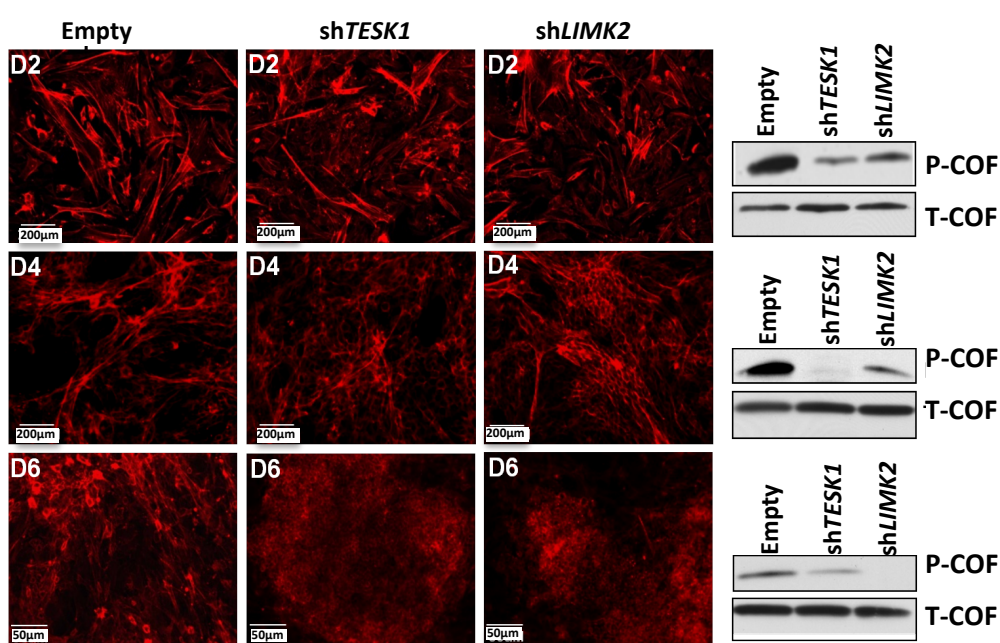**B**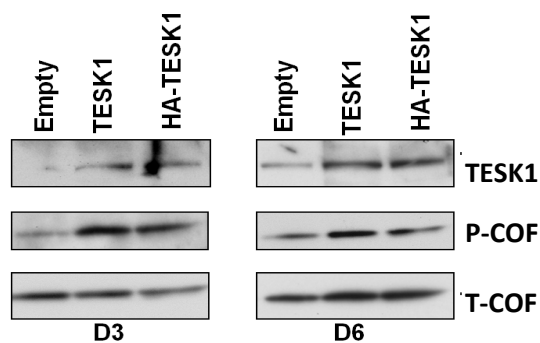**C**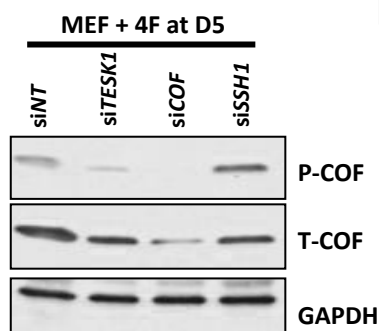**D**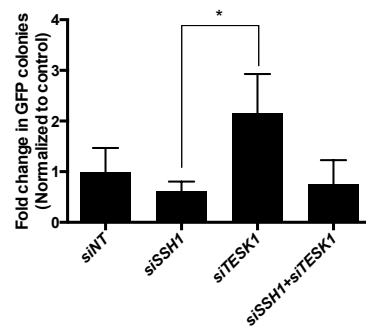**E**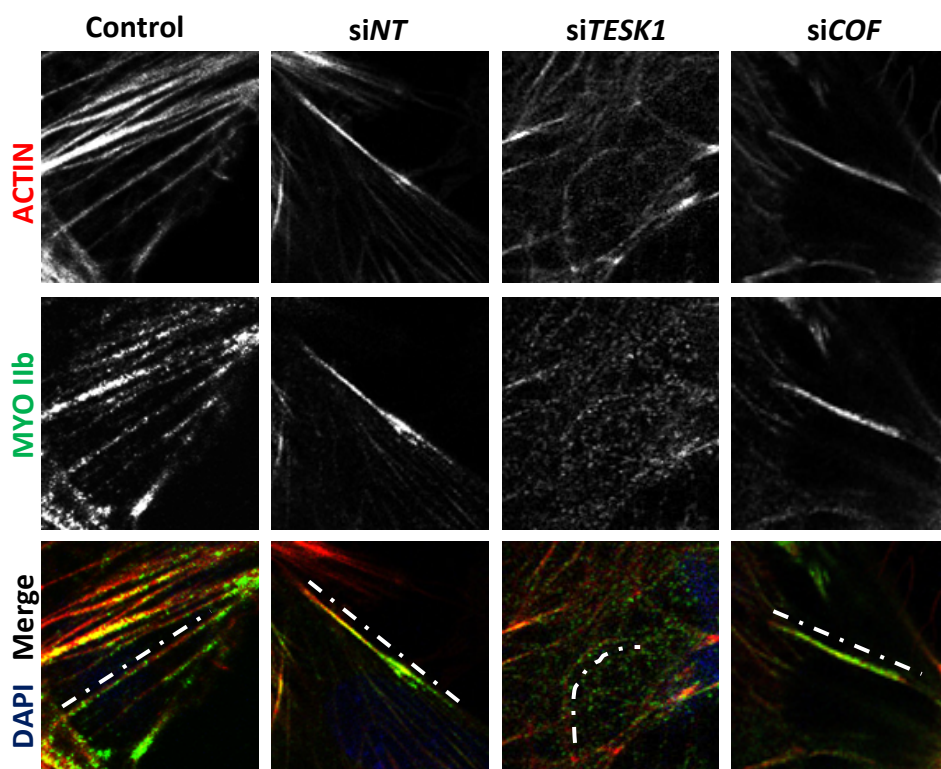

**Figure S4, related to Figure 4. Mechanism of Cytoskeletal rearrangement by TESK1 and iPSC**

(A) Silencing of TESK1 or LIMK2 promotes cytoskeletal rearrangement during reprogramming. Visualization of actin cytoskeleton formation by rhodamine-phalloidin staining (*Left* panel) and immunoblot analysis of phosphorylated (P) and total (T) cofilin (*Right* panel). MEFs were transduced with 4F followed by sh*TESK1* or sh*LIMK2* lentivirus on day 2, 4, or 6. MEFs transduced with an empty vector served as a control. (B) TESK1 or HA-TESK1 cDNA was cloned into pMX retroviral vectors and MEFs were transduced with pMX and 4F vectors. Immunoblots of TESK1, P-COF and total COF on days 3 and 6. (C and D) Knockdown of Slingshot 1 (SSH1) inhibits iPSC generation. (C) Western blot analysis shows hyper phosphorylation of COF when SSH1 is knock down using siRNAs while knocking down TESK1 with siRNA shows hypo-phosphorylation of COF in MEFs transduced with 4F. (D) Quantification of GFP+ iPSC colonies obtained from MEFs transduced with OSKM and transfected with control siRNA or siRNAs targeting SSH1 and/or TESK1. Results are the means  $\pm$  SD of three independent experiments. \* $p < 0.05$ . (E) Effect of TESK1 and COF knockdown on myosin-actin binding. Confocal images of MEF cells immunostained for Myo IIb (green) and F-actin using Rhodamine phalloidin (red) are shown. MEF cells were treated with indicated siRNAs to knock down *TESK1*, *COF*, or si*NT* and untreated MEF cells were used as controls. In control cells MyoIIb was found on the actin cables (see the cables marked by broken white line). Similarly in si*COF* treated cells, MyoIIb was found on the actin cables (cables marked by broken lines). In si*TESK1* treated cells, MyoIIb was found dispersed without forming obvious foci on the actin cables.

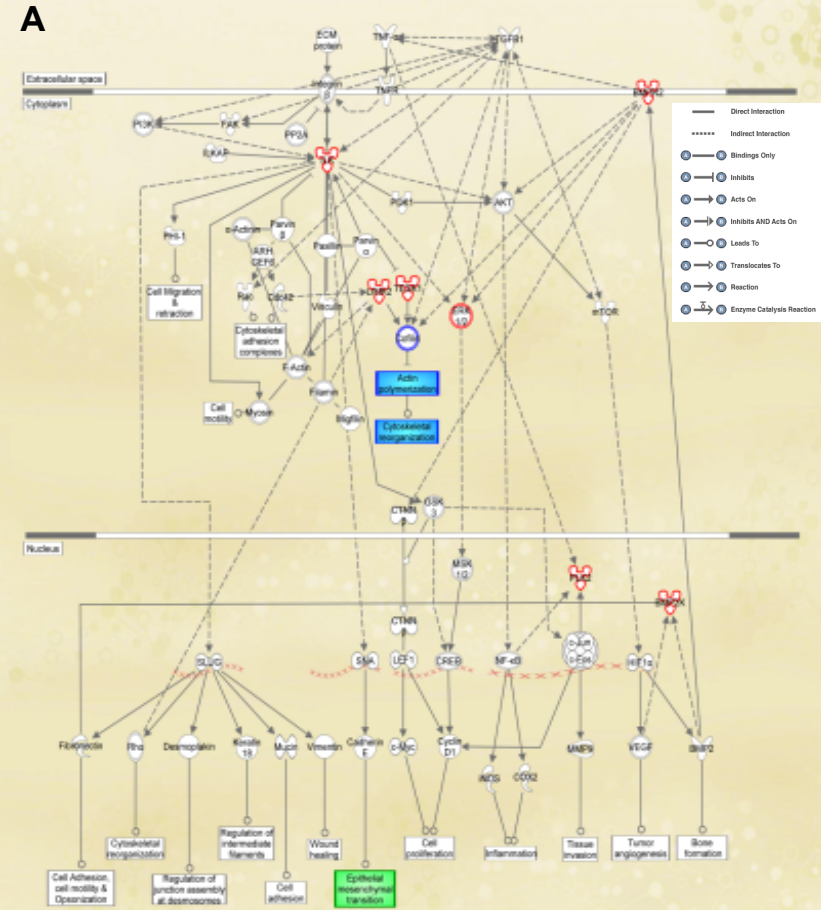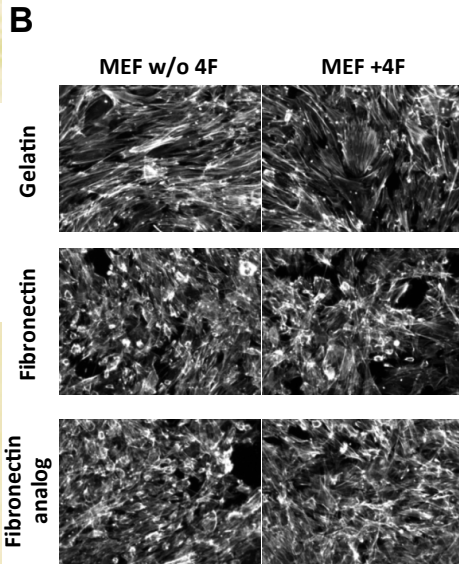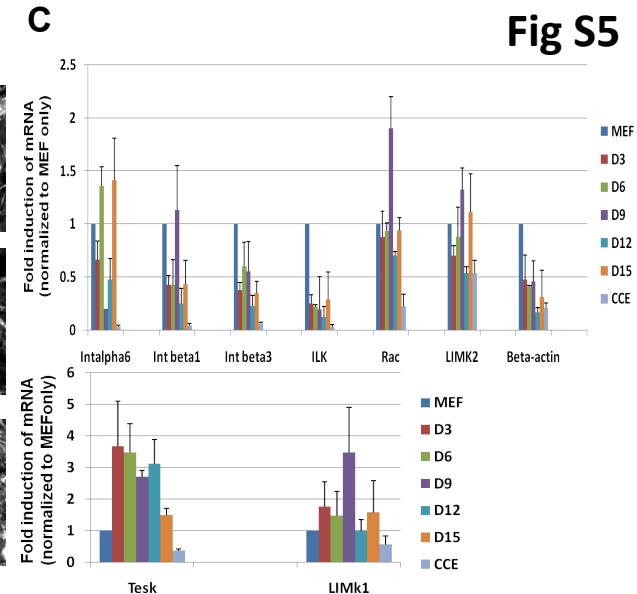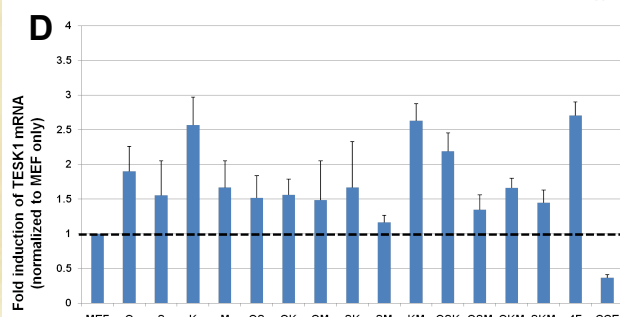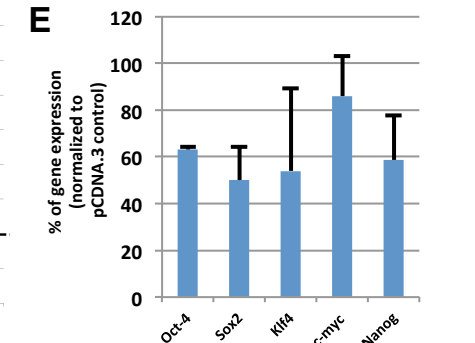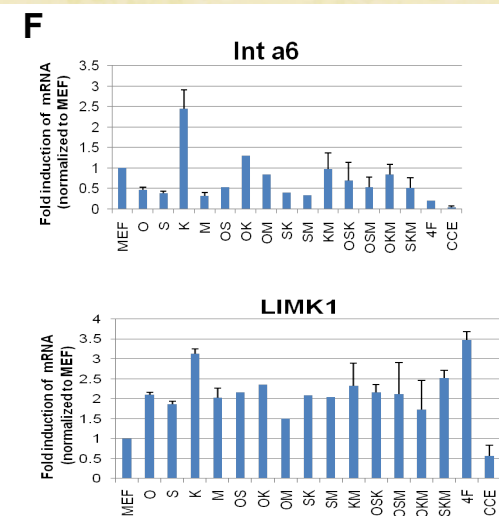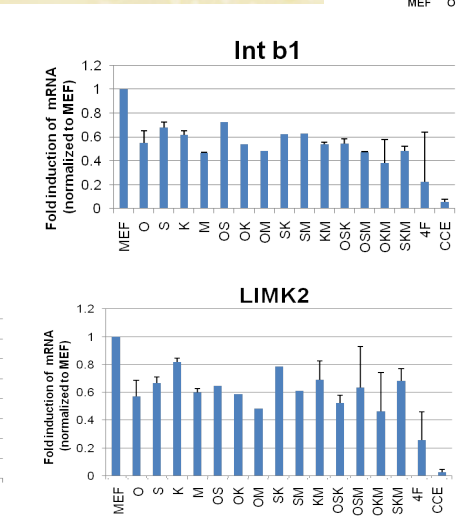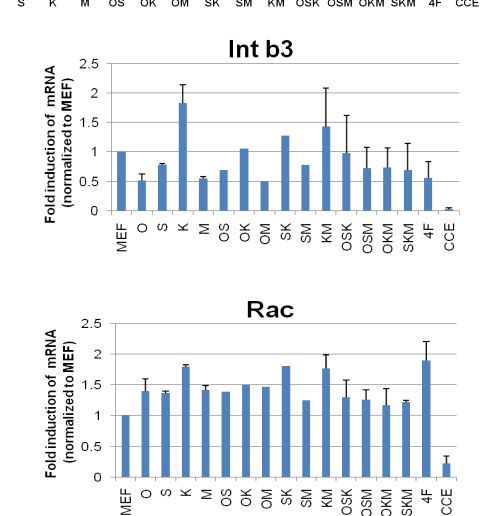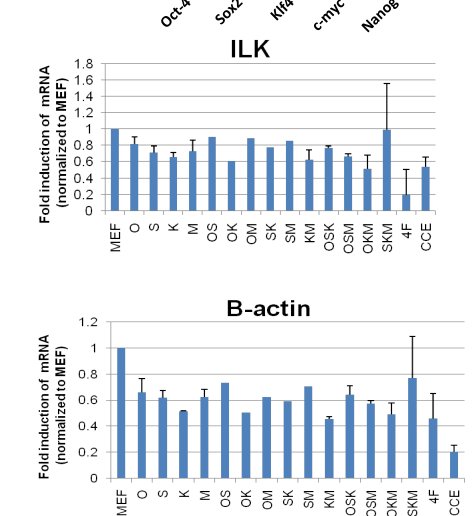

**Figure S5, related to Figure 5. Reprogramming factors differentially regulate ILK pathway genes during iPSC generation**

(A) Cross-talk between ILK and TGF- $\beta$  signaling pathways in generation of iPSCs. Several identified kinases are involved in ILK signaling network. Kinases including TESK1, LIMK2, PLK2, BMPR2, and MAPK1 are highlighted in red. Cofilin is labeled in blue. The figure is generated by using IPA (Ingenuity Systems) and the functional interaction key is shown on the lower right corner. (B) Activation of the ILK signaling pathway results in actin remodeling. MEFs were grown on plates coated with fibronectin (Fbn) or a fibronectin analog (Fbn-Anlg) to induce the ILK signaling pathway. MEFs seeded on gelatin-coated plates served as controls. Actin filaments were visualized by rhodamine-labeled phalloidin staining of cells. (C) The expression pattern of various ILK pathway genes on different days of reprogramming was monitored by RT-qPCR analysis and compared with expression in untreated MEFs and CCE mESCs. (D) Different combinations of factors were tested for their role in regulating expression of TESK1 mRNA on 8 dpi. (E) Overexpression of HA-TESK1 in mES cells reduces the levels of pluripotency marker genes. Quantitative analysis of pluripotent marker genes upon over expression of HA-tagged TESK1. (F) Different combinations of factors were tested for their role in regulating expression of ILK pathway genes on 8 dpi.



**Fig S6**

**human si*TESK1* iPSCs**

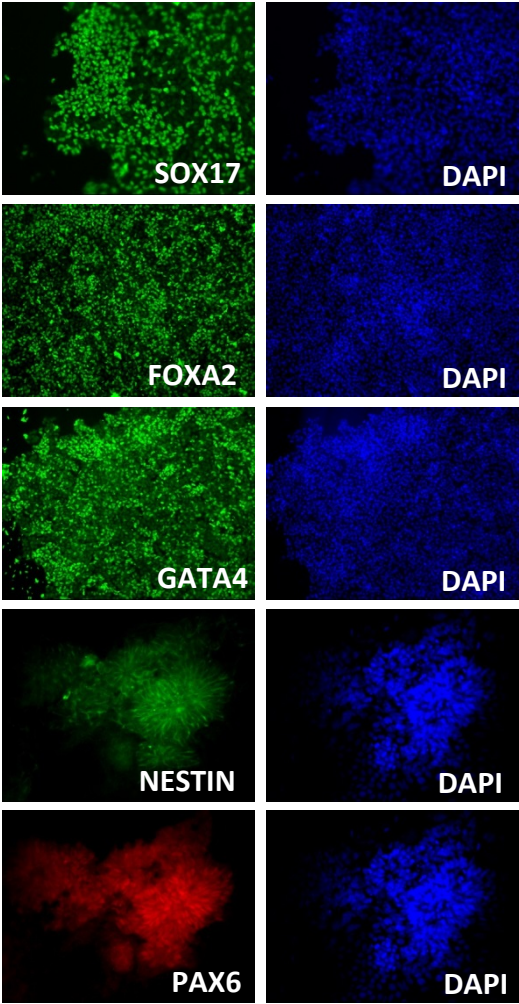

**Figure S6, related to Figure 6. Characterization of kinase-knockdown human iPSCs**

Human siTESK1-iPSCs differentiate into germ layers *in vitro*. EBs were formed using the hanging-drop method and allowed to undergo spontaneous differentiation. On day 14, differentiated cells were fixed with 4% PFA and immunostained for SOX17, FOXA2, GATA4, NESTIN, and PAX6.

## **SUPPLEMENTARY TABLES**

Tables S1, related to Figures 1 and S1

Tables S2, related to Figures 1 and S1

Tables S3, related to Figures 1 and S1

Table S4, related to Figures 2 and S2

Table S5, related to Figure 7

**Table S1, related to Figures 1 and S1. Kinases identified as primary hits**

| GeneSymbol    | AccessionList | ClusterList | GeneSymbol | AccessionList | ClusterList | GeneSymbol    | AccessionList | ClusterList | GeneSymbol | AccessionList | ClusterList |
|---------------|---------------|-------------|------------|---------------|-------------|---------------|---------------|-------------|------------|---------------|-------------|
| MAP3K14       | NM_016896     | Mm.158981   | NTRK1      | XM_283871     | Mm.80682    | FRAP1         | NM_020009     | Mm.21158    | TLK2       | NM_011903     | Mm.126976   |
| BUB1          | NM_009772     | Mm.2185     | FRK        | NM_010237     | Mm.332432   | DCLK1         | NM_019978     | Mm.458341   | TRP53RK    | NM_023815     | Mm.330796   |
| BUB1B         | NM_009773     | Mm.29133    | FGFR1      | NM_010206     | Mm.265716   | DAPK2         | NM_010019     | Mm.335252   | UHMK1      | NM_010633     | Mm.389214   |
| TGFBR1        | NM_009370     | Mm.197552   | ABL1       | NM_009594     | Mm.1318     | CAMK1D        | NM_177343     | Mm.191949   | WNK1       | NM_198703     | Mm.333349   |
| ACVRL1        | NM_009612     | Mm.279542   | BLK        | NM_007549     | Mm.3962     | BRD2          | NM_010238     | Mm.3444     | ROCK2      | NM_009072     | Mm.276024   |
| ACVR1         | NM_007394     | Mm.689      | MET        | NM_008591     | Mm.86844    | HUNK          | NM_015755     | Mm.125874   | RPS6KB1    | NM_028259     | Mm.374825   |
| RIPK3         | NM_019955     | Mm.46612    | EGFR       | NM_007912     | Mm.8534     | PHKG1         | NM_011079     | Mm.3159     | STK38L     | NM_172734     | Mm.322121   |
| IRAK3         | NM_028679     | Mm.146194   | ROS1       | NM_011282     | Mm.236163   | STK25         | NM_021537     | Mm.28761    | CDC2L1     | NM_007661     | Mm.267410   |
| RIPK1         | NM_009068     | Mm.374799   | BMX        | NM_009759     | Mm.504      | MAP3K1        | NM_011945     | Mm.15918    | SPHK2      | NM_020011     | Mm.24222    |
| TESK2         | NM_146151     | Mm.425201   | EPHB1      | NM_173447     | Mm.22897    | MAP4K4        | NM_008696     | Mm.19073    | AK3        | NM_021299     | Mm.196067   |
| RIPK2         | NM_138952     | Mm.112765   | EPHA1      | NM_023580     | Mm.133330   | MAP4K5        | NM_024275     | Mm.291936   | DGKE       | NM_019505     | Mm.153695   |
| BMPR2         | NM_007561     | Mm.7106     | ZAP70      | NM_009539     | Mm.8038     | MAP2K1        | NM_008927     | Mm.248907   | ADK        | NM_134079     | Mm.188734   |
| IRAK2         | NM_172161     | Mm.152142   | EPHA8      | NM_007939     | Mm.1390     | PAK7          | NM_172858     | Mm.131572   | PIK3C2G    | NM_011084     | Mm.391538   |
| IRAK4         | NM_029926     | Mm.422858   | ROR2       | NM_013846     | Mm.342774   | STK24         | NM_145465     | Mm.390756   | GALK2      | NM_175154     | Mm.20216    |
| LIMK2         | NM_010718     | Mm.124176   | EPHA10     | NM_177671     | Mm.171490   | MAP3K6        | NM_016693     | Mm.36640    | NME1       | NM_008704     | Mm.439702   |
| B230120H23RIK | NM_023057     | Mm.314618   | NTRK3      | NM_008746     | Mm.33496    | CSNK2B        | NM_009975     | Mm.378901   | TK1        | NM_009387     | Mm.2661     |
| BC021891      | NM_145608     | Mm.216458   | PTK2       | NM_007982     | Mm.254494   | PRPF4B        | NM_013830     | Mm.10027    | PCK1       | NM_011044     | Mm.266867   |
| BMPR1A        | NM_009758     | Mm.237825   | MATK       | NM_010768     | Mm.2918     | KHK           | NM_008439     | Mm.22451    | STK10      | NM_009288     | Mm.8235     |
| TESK1         | NM_011571     | Mm.10154    | FGFR2      | NM_010207     | Mm.16340    | 4930444A02RIK | NM_029037     | Mm.17631    | CDKN1A     | NM_007669     | Mm.195663   |
| MAP3K12       | NM_009582     | Mm.172897   | CSNK1G3    | NM_152809     | Mm.368668   | 6330514A18RIK | NM_183152     | Mm.17613    | CCND3      | NM_007632     | Mm.246520   |
| MAP3K9        | NM_177395     | Mm.436861   | FLT4       | NM_008029     | Mm.3291     | NPR2          | NM_173788     | Mm.103477   | HUS1       | NM_008316     | Mm.42201    |
| PRKCA         | NM_011101     | Mm.222178   | TTBK2      | NM_080788     | Mm.275698   | TTK           | NM_009445     | Mm.1904     | BRSK2      | NM_029426     | Mm.274868   |
| SGK2          | NM_013731     | Mm.26462    | RYK        | NM_013649     | Mm.335391   | BMP2K         | NM_080708     | Mm.281490   | CDKN2D     | NM_009878     | Mm.29020    |
| CDKL3         | NM_153785     | Mm.280557   | CSNK1D     | NM_027874     | Mm.216227   | CAMKK1        | NM_018883     | Mm.9998     | DBF4       | NM_013726     | Mm.292470   |
| ANKK1         | NM_172922     | Mm.119994   | ADCK4      | NM_133770     | Mm.124728   | EIF2AK2       | NM_011163     | Mm.378990   | GTF2F1     | NM_133801     | Mm.24632    |
| CDK3          | NM_027165     | Mm.33677    | TSSK2      | NM_009436     | Mm.310201   | GS2           | NM_010353     | Mm.42045    | CCNB1      | NM_172301     | Mm.260114   |
| MAPK1         | NM_011949     | Mm.196581   | STK40      | NM_028800     | Mm.440269   | MOS           | NM_020021     | Mm.459300   | AKAP3      | NM_009650     | Mm.87748    |
| CLK1          | NM_009905     | Mm.1761     | STK33      | XM_358897     | Mm.389950   | NEK2          | NM_010892     | Mm.33773    | AKAP10     | NM_019921     | Mm.274404   |
| SRPK1         | NM_016795     | Mm.15252    | SNF1LK     | NM_010831     | Mm.290941   | NEK6          | NM_021606     | Mm.143818   | PRKCDBP    | NM_028444     | Mm.3124     |
| RAGE          | NM_011973     | Mm.140948   | PRKCM      | NM_008858     | Mm.133719   | NEK8          | NM_080849     | Mm.23788    | PKIG       | NM_011106     | Mm.10091    |
| AATK          | NM_007377     | Mm.6826     | PIM3       | NM_145478     | Mm.400129   | NEK9          | NM_145138     | Mm.29071    | PIK3R5     | NM_177320     | Mm.244960   |
| EPHA5         | NM_007937     | Mm.137991   | PIM2       | NM_138606     | Mm.347478   | PDIK1L        | NM_146156     | Mm.22778    | GIT2       | NM_019834     | Mm.195632   |
| CDC2L6        | NM_198164     | Mm.200924   | PDK4       | NM_013743     | Mm.235547   | PLK1          | NM_011121     | Mm.16525    | PICK1      | NM_008837     | Mm.259464   |
| ITK           | NM_010583     | Mm.339927   | PASK       | NM_080850     | Mm.379454   | PLK2          | NM_152804     | Mm.380      | PIK3AP1    | NM_031376     | Mm.222266   |
| LTK           | NM_206941     | Mm.1740     | MYLK       | NM_139300     | Mm.33360    | PLK3          | NM_013807     | Mm.259022   | CNKSR3     | NM_172546     | Mm.37984    |
| DDR1          | NM_007584     | Mm.5021     | MKNK2      | NM_021462     | Mm.42126    | RNASEL        | NM_011882     | Mm.259254   | AKAP8L     | NM_017476     | Mm.281005   |
| JAK1          | NM_146145     | Mm.289657   | MELK       | NM_010790     | Mm.268668   | SCYL1         | NM_023912     | Mm.276063   | PER2       | NM_011066     | Mm.218141   |
| EPHB2         | NM_010142     | Mm.250981   | MARK3      | NM_022801     | Mm.425769   | TBK1          | NM_019786     | Mm.34580    | FASTKD5    | NM_198176     | Mm.27090    |

**Table S2, related to Figures 1 and S1. Kinases identified as confirmed hits**

| <b>GeneSymbol</b> | <b>AccessionList</b> | <b>ClusterList</b> |
|-------------------|----------------------|--------------------|
| BUB1B             | NM_009773            | Mm.29133           |
| IRAK3             | NM_028679            | Mm.146194          |
| BMPR2             | NM_007561            | Mm.7106            |
| IRAK2             | NM_172161            | Mm.152142          |
| LIMK2             | NM_010718            | Mm.124176          |
| BMPR1A            | NM_009758            | Mm.237825          |
| TESK1             | NM_011571            | Mm.10154           |
| PRKCA             | NM_011101            | Mm.222178          |
| MAPK1             | NM_011949            | Mm.196581          |
| SRPK1             | NM_016795            | Mm.15252           |
| RAGE              | NM_011973            | Mm.140948          |
| AATK              | NM_007377            | Mm.6826            |
| EPHA5             | NM_007937            | Mm.137991          |
| CDC2L6            | NM_198164            | Mm.200924          |
| DDR1              | NM_007584            | Mm.5021            |
| JAK1              | NM_146145            | Mm.289657          |
| EPHA1             | NM_023580            | Mm.133330          |
| SNF1LK            | NM_010831            | Mm.290941          |
| PIM2              | NM_138606            | Mm.347478          |
| FRAP1             | NM_020009            | Mm.21158           |
| DAPK2             | NM_010019            | Mm.335252          |
| TRIB3             | NM_175093            | Mm.276018          |
| DAPK3             | NM_007828            | Mm.10294           |
| CAMKV             | NM_145621            | Mm.274540          |
| STK25             | NM_021537            | Mm.28761           |
| MAP2K1            | NM_008927            | Mm.248907          |
| PAK7              | NM_172858            | Mm.131572          |
| STK24             | NM_145465            | Mm.390756          |
| CSNK2B            | NM_009975            | Mm.378901          |
| KHK               | NM_008439            | Mm.22451           |

| <b>GeneSymbol</b> | <b>AccessionList</b> | <b>ClusterList</b> |
|-------------------|----------------------|--------------------|
| 6330514A18RIK     | NM_183152            | Mm.17613           |
| NPR2              | NM_173788            | Mm.103477          |
| BMP2K             | NM_080708            | Mm.281490          |
| EIF2AK2           | NM_011163            | Mm.378990          |
| MOS               | NM_020021            | Mm.459300          |
| NEK2              | NM_010892            | Mm.33773           |
| NEK6              | NM_021606            | Mm.143818          |
| PLK1              | NM_011121            | Mm.16525           |
| PLK2              | NM_152804            | Mm.380             |
| RNASEL            | NM_011882            | Mm.259254          |
| SCYL1             | NM_023912            | Mm.276063          |
| TBK1              | NM_019786            | Mm.34580           |
| TLK2              | NM_011903            | Mm.126976          |
| UHMK1             | NM_010633            | Mm.389214          |
| RPS6KB1           | NM_028259            | Mm.374825          |
| AK3               | NM_021299            | Mm.196067          |
| DGKE              | NM_019505            | Mm.153695          |
| PIK3C2G           | NM_011084            | Mm.391538          |
| GALK2             | NM_175154            | Mm.20216           |
| NME1              | NM_008704            | Mm.439702          |
| GTF2F1            | NM_133801            | Mm.24632           |
| PKIG              | NM_011106            | Mm.10091           |
| PIK3R5            | NM_177320            | Mm.244960          |
| GIT2              | NM_019834            | Mm.195632          |
| PIK3AP1           | NM_031376            | Mm.222266          |
| CNKSR3            | NM_172546            | Mm.37984           |
| PKIB              | NM_008863            | Mm.262135          |
| PER2              | NM_011066            | Mm.218141          |
| FASTKD5           | NM_198176            | Mm.27090           |

**Table S3, related to Figures 1 and S1. Kinases involved in cell cycle or cytoskeleton formation**

| <b>Gene name</b> | <b>Functions</b>                                                                                                                                                                                                                                                                                                                                                                                                   | <b>Reference</b>                                            |
|------------------|--------------------------------------------------------------------------------------------------------------------------------------------------------------------------------------------------------------------------------------------------------------------------------------------------------------------------------------------------------------------------------------------------------------------|-------------------------------------------------------------|
| Bub1B            | Cell cycle: spindle checkpoint function, localized to the kinetochore and plays a role in the inhibition of the anaphase-promoting complex/cyclosome (APC/C), delaying the onset of anaphase and ensuring proper chromosome segregation.                                                                                                                                                                           | (Davenport et al., 1999; Matsuura et al., 2006)             |
| Srpk1            | Plays a central role in the regulatory network for splicing, controlling the intranuclear distribution of splicing factors in interphase cells and the reorganization of nuclear speckles during mitosis.                                                                                                                                                                                                          | (Gui et al., 1994)                                          |
| FRAP1/mTOR       | This protein acts as the target for the cell-cycle arrest and immunosuppressive effects of the FKBP12-rapamycin complex.                                                                                                                                                                                                                                                                                           | (Shah et al., 2001)                                         |
| Nek2             | Protein kinase that is involved in mitotic regulation. Integral component of the mitotic spindle-assembly checkpoint which is necessary for proper chromosome segregation during metaphase-anaphase transition.                                                                                                                                                                                                    | (Chen et al., 2002; Fletcher et al., 2004; Wu et al., 2007) |
| PLK1             | performs several important functions throughout M phase of the cell cycle, including the regulation of centrosome maturation and spindle assembly, the removal of cohesins from chromosome arms, the inactivation of APC/C inhibitors, and the regulation of mitotic exit and cytokinesis.                                                                                                                         | (Chan et al., 2008; Macurek et al., 2008; Qi et al., 2006)  |
| TLK2             | Rapidly and transiently inhibited by phosphorylation following the generation of DNA double-stranded breaks during S-phase. This is cell cycle checkpoint and ATM-pathway dependent and appears to regulate processes involved in chromatin assembly                                                                                                                                                               | (Sillje et al., 1999)                                       |
| Uhmk1            | Upon serum stimulation, phosphorylates CDKN1B/p27Kip1, thus controlling CDKN1B subcellular location and cell cycle progression in G1 phase. May be involved in trafficking and/or processing of RNA                                                                                                                                                                                                                | (Crook et al., 2008)                                        |
| Nek6             | Activated during M phase. Required for chromosome segregation at metaphase-anaphase transition and therefore for mitotic progression. Inhibition of activity results in apoptosis.                                                                                                                                                                                                                                 | (O'Regan and Fry, 2009)                                     |
| Pim2             | protein functions to prevent apoptosis and to promote cell survival                                                                                                                                                                                                                                                                                                                                                | (Gong et al., 2009; Ren et al., 2010)                       |
| PAK7/PAK5        | The protein encoded by this gene is a member of the PAK family of Ser/Thr protein kinases. This kinase contains a CDC42/Rac1 interactive binding (CRIB) motif, and has been shown to bind CDC42 in the presence of GTP. This kinase is associated with microtubule networks and induces microtubule stabilization. The subcellular localization of this kinase is tightly regulated during cell cycle progression. | (Cotteret et al., 2003; Matenia et al., 2005)               |
| DAPK2            | cell apoptosis, calcium calmodulin dependent protein kinase.                                                                                                                                                                                                                                                                                                                                                       | (Kawai et al., 1999)                                        |
| DGKe             | Phosphatidic acid which is produced from DAG by DGKE is important for actin cytoskeleton remodeling in plants                                                                                                                                                                                                                                                                                                      | (Huang et al., 2006)                                        |
| Mark3            | A kinase of this, MARKK, is involved in microtubule and cytoskeleton remodeling and has a role to play in Tesk 1 function                                                                                                                                                                                                                                                                                          | (Johne et al., 2008)                                        |
| Acvr1            | activin receptor type 1, also known as Activin receptor-like kinase 2 or ALK2. Activin receptor-like kinase 5 or ALK 5 is a TGF-beta receptor, which is involved in Cofilin-P and eventually cytoskeleton remodeling.                                                                                                                                                                                              | (Vardouli et al., 2005)                                     |

## Table S3: References

- Chan, E.H., Santamaria, A., Sillje, H.H., and Nigg, E.A. (2008). Plk1 regulates mitotic Aurora A function through betaTrCP-dependent degradation of hBora. *Chromosoma* 117, 457-469.
- Chen, Y., Riley, D.J., Zheng, L., Chen, P.L., and Lee, W.H. (2002). Phosphorylation of the mitotic regulator protein Hec1 by Nek2 kinase is essential for faithful chromosome segregation. *J Biol Chem* 277, 49408-49416.
- Cotteret, S., Jaffer, Z.M., Beeser, A., and Chernoff, J. (2003). p21-Activated kinase 5 (Pak5) localizes to mitochondria and inhibits apoptosis by phosphorylating BAD. *Mol Cell Biol* 23, 5526-5539.
- Crook, M.F., Olive, M., Xue, H.H., Langenickel, T.H., Boehm, M., Leonard, W.J., and Nabel, E.G. (2008). GA-binding protein regulates KIS gene expression, cell migration, and cell cycle progression. *FASEB J* 22, 225-235.
- Davenport, J.W., Fernandes, E.R., Harris, L.D., Neale, G.A., and Goorha, R. (1999). The mouse mitotic checkpoint gene bub1b, a novel bub1 family member, is expressed in a cell cycle-dependent manner. *Genomics* 55, 113-117.
- Fletcher, L., Cerniglia, G.J., Nigg, E.A., Yend, T.J., and Muschel, R.J. (2004). Inhibition of centrosome separation after DNA damage: a role for Nek2. *Radiat Res* 162, 128-135.
- Gong, J., Wang, J., Ren, K., Liu, C., Li, B., and Shi, Y. (2009). Serine/threonine kinase Pim-2 promotes liver tumorigenesis induction through mediating survival and preventing apoptosis of liver cell. *J Surg Res* 153, 17-22.
- Gui, J.F., Lane, W.S., and Fu, X.D. (1994). A serine kinase regulates intracellular localization of splicing factors in the cell cycle. *Nature* 369, 678-682.
- Huang, S., Gao, L., Blanchoin, L., and Staiger, C.J. (2006). Heterodimeric capping protein from Arabidopsis is regulated by phosphatidic acid. *Mol Biol Cell* 17, 1946-1958.
- Johne, C., Matenia, D., Li, X.Y., Timm, T., Balusamy, K., and Mandelkow, E.M. (2008). Spred1 and TESK1--two new interaction partners of the kinase MARKK/TAO1 that link the microtubule and actin cytoskeleton. *Mol Biol Cell* 19, 1391-1403.
- Kawai, T., Nomura, F., Hoshino, K., Copeland, N.G., Gilbert, D.J., Jenkins, N.A., and Akira, S. (1999). Death-associated protein kinase 2 is a new calcium/calmodulin-dependent protein kinase that signals apoptosis through its catalytic activity. *Oncogene* 18, 3471-3480.
- Macurek, L., Lindqvist, A., Lim, D., Lampson, M.A., Klompaker, R., Freire, R., Clouin, C., Taylor, S.S., Yaffe, M.B., and Medema, R.H. (2008). Polo-like kinase-1 is activated by aurora A to promote checkpoint recovery. *Nature* 455, 119-123.
- Matenia, D., Griesshaber, B., Li, X.Y., Thiessen, A., John, C., Jiao, J., Mandelkow, E., and Mandelkow, E.M. (2005). PAK5 kinase is an inhibitor of MARK/Par-1, which leads to stable microtubules and dynamic actin. *Mol Biol Cell* 16, 4410-4422.
- Matsuura, S., Matsumoto, Y., Morishima, K., Izumi, H., Matsumoto, H., Ito, E., Tsutsui, K., Kobayashi, J., Tauchi, H., Kajiwara, Y., *et al.* (2006). Monoallelic BUB1B mutations and defective mitotic-spindle checkpoint in seven families with premature chromatid separation (PCS) syndrome. *Am J Med Genet A* 140, 358-367.
- O'Regan, L., and Fry, A.M. (2009). The Nek6 and Nek7 protein kinases are required for robust mitotic spindle formation and cytokinesis. *Mol Cell Biol* 29, 3975-3990.
- Qi, W., Tang, Z., and Yu, H. (2006). Phosphorylation- and polo-box-dependent binding of Plk1 to Bub1 is required for the kinetochore localization of Plk1. *Mol Biol Cell* 17, 3705-3716.
- Ren, K., Zhang, W., Shi, Y., and Gong, J. (2010). Pim-2 activates API-5 to inhibit the apoptosis of hepatocellular carcinoma cells through NF-kappaB pathway. *Pathol Oncol Res* 16, 229-237.
- Shah, S.A., Potter, M.W., Ricciardi, R., Perugini, R.A., and Callery, M.P. (2001). FRAP-p70s6K signaling is required for pancreatic cancer cell proliferation. *J Surg Res* 97, 123-130.

Sillje, H.H., Takahashi, K., Tanaka, K., Van Houwe, G., and Nigg, E.A. (1999). Mammalian homologues of the plant Tousled gene code for cell-cycle-regulated kinases with maximal activities linked to ongoing DNA replication. *EMBO J* 18, 5691-5702.

Vardouli, L., Moustakas, A., and Stournaras, C. (2005). LIM-kinase 2 and cofilin phosphorylation mediate actin cytoskeleton reorganization induced by transforming growth factor-beta. *J Biol Chem* 280, 11448-11457.

Wu, W., Baxter, J.E., Wattam, S.L., Hayward, D.G., Fardilha, M., Knebel, A., Ford, E.M., da Cruz e Silva, E.F., and Fry, A.M. (2007). Alternative splicing controls nuclear translocation of the cell cycle-regulated Nek2 kinase. *J Biol Chem* 282, 26431-26440.



**Table S4, related to Figures 2 and S2. Functions of six barrier genes in iPSC generation**

| molecular functions <sup>1</sup> |              |                                                                                                                                                                                                                                                                                                                                    | microRNAs <sup>2</sup>                       |
|----------------------------------|--------------|------------------------------------------------------------------------------------------------------------------------------------------------------------------------------------------------------------------------------------------------------------------------------------------------------------------------------------|----------------------------------------------|
| DGKE                             | mol func     | Diacylglycerol kinase activity; ATP binding; Nucleotide and protein binding; Transferase activity                                                                                                                                                                                                                                  | --                                           |
|                                  | role in cell | Long-term potentiation; Activation of protein kinase C activity by G-protein coupled receptor protein signaling pathway                                                                                                                                                                                                            |                                              |
| PLK2                             | mol func     | protein serine/threonine kinase activity; signal transducer activity; ATP binding, polo kinase kinase activity; nucleotide and protein binding                                                                                                                                                                                     | miR10a, miR27b, miR30a, miRn339              |
|                                  | role in cell | apoptosis; degradation in; survival and growth; S phase; positive regulation of I-kappaB kinase/NF-kappaB cascade                                                                                                                                                                                                                  |                                              |
| TESK1                            | mol func     | Protein serine/threonine kinase activity; protein tyrosine kinase activity; ATP binding; transferase activity; metal ion binding; ILK Signaling                                                                                                                                                                                    | miR127, miR196a1, miR196a2, miR196b, miRn338 |
|                                  | role in cell | formation; cell spreading; its protein kinase domain is most closely related to those of the LIM motif-containing protein kinases (LIMKs), expressed in testicular germ cells; outgrowth.                                                                                                                                          |                                              |
| BMP2K                            | mol func     | Protein serine/threonine kinase activity; ATP binding; transferase activity; phosphatase regulator activity                                                                                                                                                                                                                        | --                                           |
|                                  | role in cell | BMPs play a key role in skeletal development and patterning; expression is increased during BMP-2 induced differentiation and the gene product contains a nuclear localization signal.                                                                                                                                             |                                              |
| BMPR2                            | mol func     | receptor activity; transforming growth factor beta receptor activity; Protein serine/threonine kinase activity; ATP binding; transferase activity                                                                                                                                                                                  | --                                           |
|                                  | role in cell | mesoderm formation; positive regulation of endothelial cell proliferation; transmembrane receptor protein serine/threonine kinase activity; anterior/posterior pattern formation; positive regulation of pathway-restricted SMAD protein phosphorylation; negative regulation of cell growth; positive regulation of BMP signaling |                                              |
| MAPK1                            | mol func     | phosphotyrosine binding; Protein serine/threonine kinase activity; ATP binding; transferase activity; DNA binding; MAP kinase activity; MAP kinase 2 activity                                                                                                                                                                      | miR125a, miR145, miR149, miR202, miR320a     |
|                                  | role in cell | nuclear translocation of MAPK; induction of apoptosis; response to stress; response to DNA damage stimulus; cell cycle; signal transduction; positive regulation of cell migration; positive regulation of cell proliferation; negative regulation of cell differentiation                                                         |                                              |

<sup>1</sup>Molecular functions of six kinases were determined using GO annotations: Molecular functions (mol func) and biological process (role in cell). Six kinases listed are: DGKE (NM\_019505), PLK2 (NM\_152804), TESK1 (NM\_011571), BMP2K (NM\_080708), BMPR2 (NM\_007561), MAPK1 (NM\_011949).

<sup>2</sup>MicroRNAs that are predicted to target these genes are also listed.

**Table S5, related to Figure 7. Bridge proteins between barrier kinases and 4 transcription factors**

| Mutual Interactor | TF interacting with  | Kinase interacting with            | Canonical Pathways<br>(Signal Transduction) | Canonical Pathways<br>(Cell Communication)                   |
|-------------------|----------------------|------------------------------------|---------------------------------------------|--------------------------------------------------------------|
| Abl1              | Myc                  | Epha1,Epha5,Mtor                   | ErbB                                        |                                                              |
| Akt1              | Myc,Sox2             | Mtor,Pik3r5,Rps6kb1,Trib3          | ErbB,MAPK,VEGF                              | Focal Adhesion,Tight Junction                                |
| Atf4              | Pou5f1,Sox2          | Dapk3,Trib3                        | MAPK                                        |                                                              |
| Birc5             | Myc                  | Bub1b,Plk1                         |                                             |                                                              |
| Bmp4              | Myc,Pou5f1,Sox2      | Bmpr1a,Bmpr2                       | TGF- $\beta$                                |                                                              |
| Cdk1              | Myc                  | Bub1b,Map2k1,Nek2,Plk1             |                                             | Gap Junction                                                 |
| Clock             | Pou5f1,Sox2          | Per2,Prkca                         |                                             |                                                              |
| Csnk2a2           | Myc                  | Csnk2b,Per2                        | Wnt                                         | Adherens Junction,Tight Junction                             |
| Ctnnb1            | Myc,Klf4,Pou5f1,Sox2 | Bmpr1a,Csnk2b                      | Wnt                                         | Focal Adhesion,Adherens Junction,Tight Junction              |
| Egf               | Myc                  | Map2k1,Mapk1                       | ErbB,MAPK                                   | Focal Adhesion,Gap Junction                                  |
| Egfr              | Myc                  | Jak1,Mapk1,Pik3r5                  | ErbB,MAPK                                   | Focal Adhesion,Adherens Junction,Gap Junction                |
| Erb2              | Myc                  | Jak1,Mapk1,Pik3r5                  | ErbB                                        | Focal Adhesion,Adherens Junction                             |
| Fos               | Myc,Pou5f1,Sox2      | Jak1,Mapk1                         | MAPK                                        |                                                              |
| Hras1             | Myc                  | Map2k1,Mapk1,Mos,Mtor,Pik3r5,Prkca |                                             |                                                              |
| Mapk3             | Myc                  | Dapk2,Dapk3,Map2k1,Mapk1           | ErbB,MAPK,TGF- $\beta$ ,VEGF                | Focal Adhesion,Adherens Junction,Gap Junction                |
| Pkm2              | Pou5f1               | Nme1,Npr2                          |                                             |                                                              |
| Pten              | Myc                  | Bmpr1a,Mtor,Pik3c2g,Pik3r5         |                                             | Focal Adhesion,Tight Junction                                |
| Raf1              | Myc                  | Map2k1,Mapk1,Pak7,Prkca            | ErbB,MAPK,VEGF                              | Focal Adhesion,Gap Junction                                  |
| Smad1             | Pou5f1,Sox2          | Bmpr1a,Bmpr2,Mapk1                 | TGF- $\beta$                                |                                                              |
| Smad2             | Pou5f1,Sox2          | Bmpr2,Mapk1                        | TGF- $\beta$ ,Wnt                           | Adherens Junction                                            |
| Smad4             | Myc                  | Bmpr1a,Bmpr2,Mapk1                 | TGF- $\beta$ ,Wnt                           | Adherens Junction                                            |
| Src               | Myc                  | Mapk1,Pik3r5,Prkca                 | ErbB,VEGF                                   | Focal Adhesion,Adherens Junction,Gap Junction,Tight Junction |
| Stat3             | Myc,Klf4,Pou5f1,Sox2 | Eif2ak2,Jak1,Mapk1,Nek6            |                                             |                                                              |
| Tnf               | Myc                  | Irak3,Mapk1,Mtor,Pik3r5            | MAPK,TGF- $\beta$                           |                                                              |
